# Supplementary material for: Synthesis and characterization of copper(ii) complexes: their catalytic behavior towards alcohol oxidation using NaOCl as the oxidant
Source: Royal Society of Chemistry journal article supplement (doi:10.1039/d4nj03011g), 2024-01-01
Supplement: d4nj03011g1.pdf [file d4nj03011g1.pdf]

**ESI**

**Synthesis and characterization of copper(II) complexes: Their catalytic behavior towards  
alcohol oxidation using NaOCl as the oxidant**

Suparna Roy,<sup>a</sup> Arpita Barma,<sup>a</sup> Debasmita Muhuri,<sup>a</sup> Pritam Ghosh<sup>b</sup> and Partha Roy\*,<sup>a</sup>

<sup>a</sup> Department of Chemistry, Jadavpur University, Kolkata 700032, India

Email Address: partha.roy@jadavpuruniversity.in

<sup>b</sup> Department of Chemistry, Humboldt-Universität zu Berlin, Brook-Taylor-Straße 2, Berlin  
12489, Germany

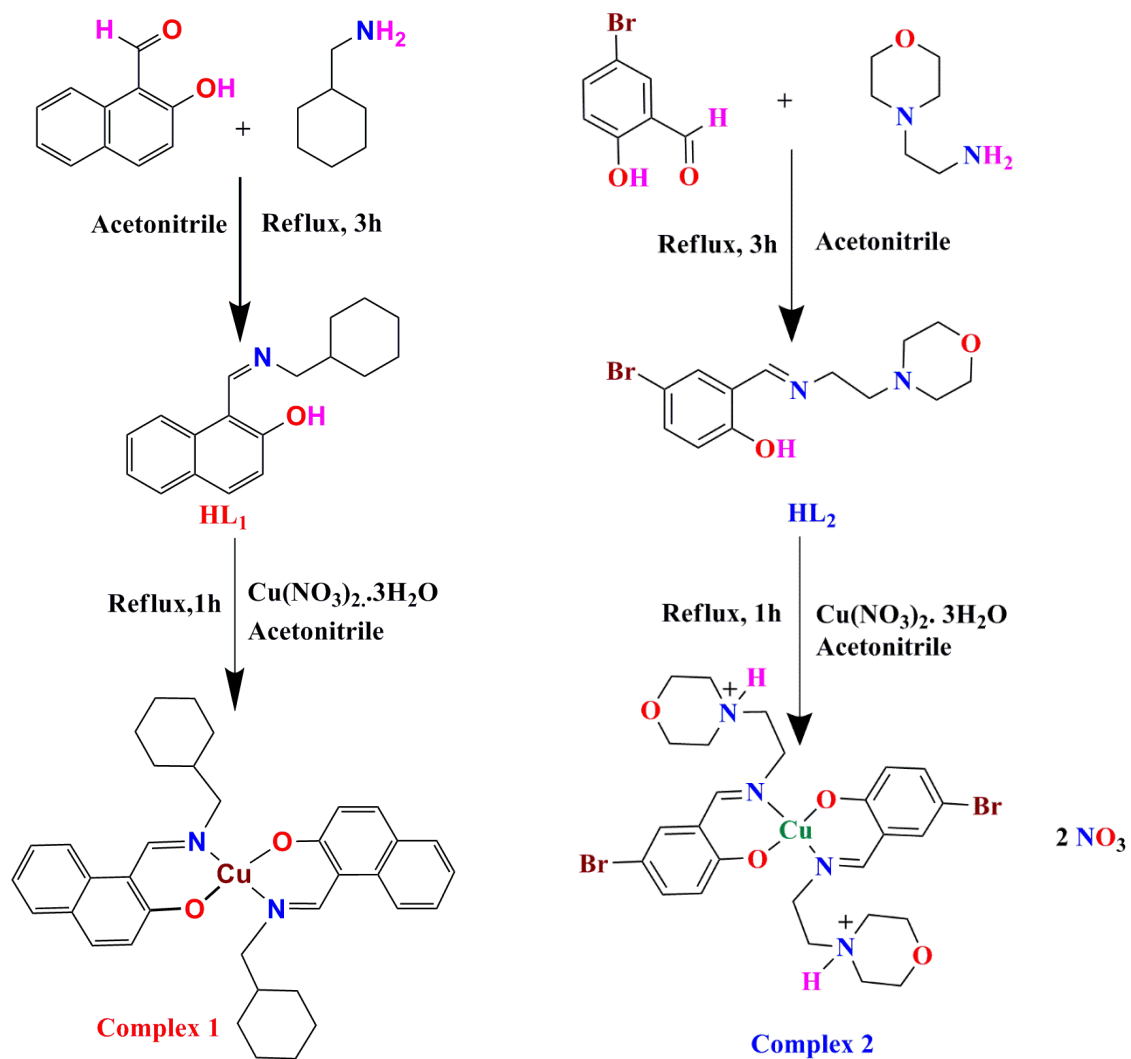

**Scheme S1** Synthetic route to Complex 1 and Complex 2.

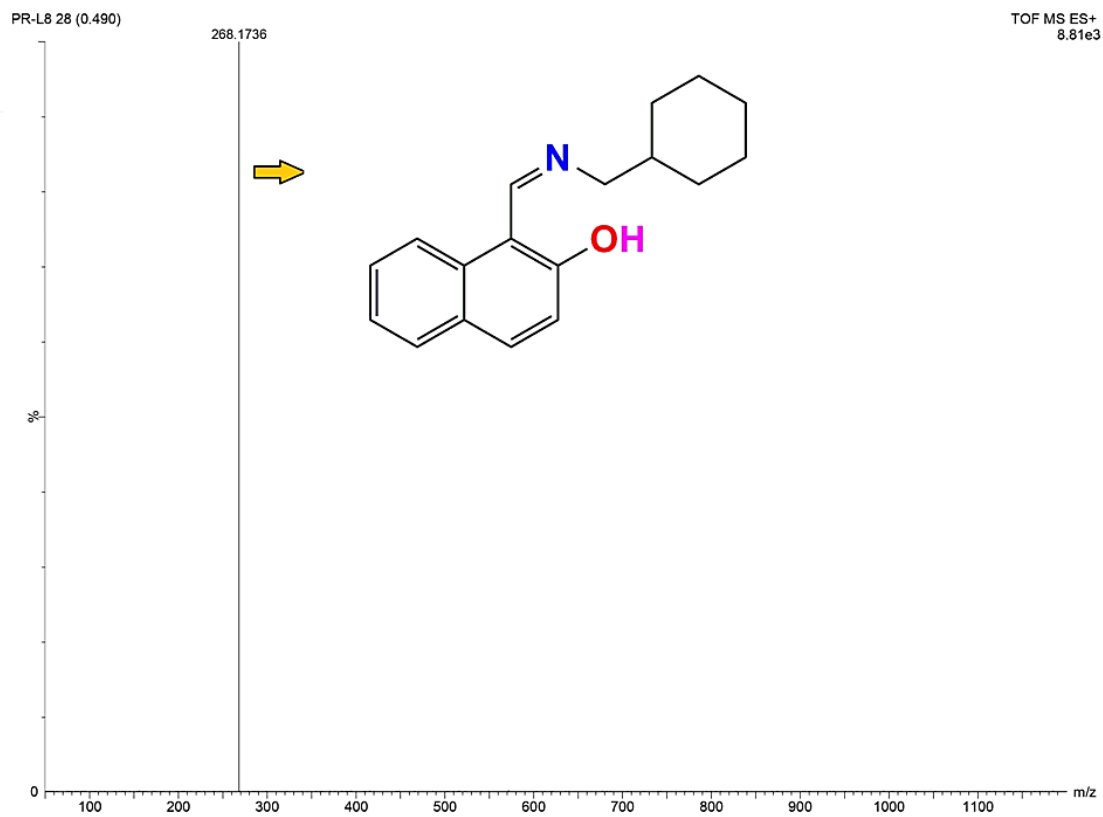

**Fig. S1** ESI mass spectrum of HL<sub>1</sub>.

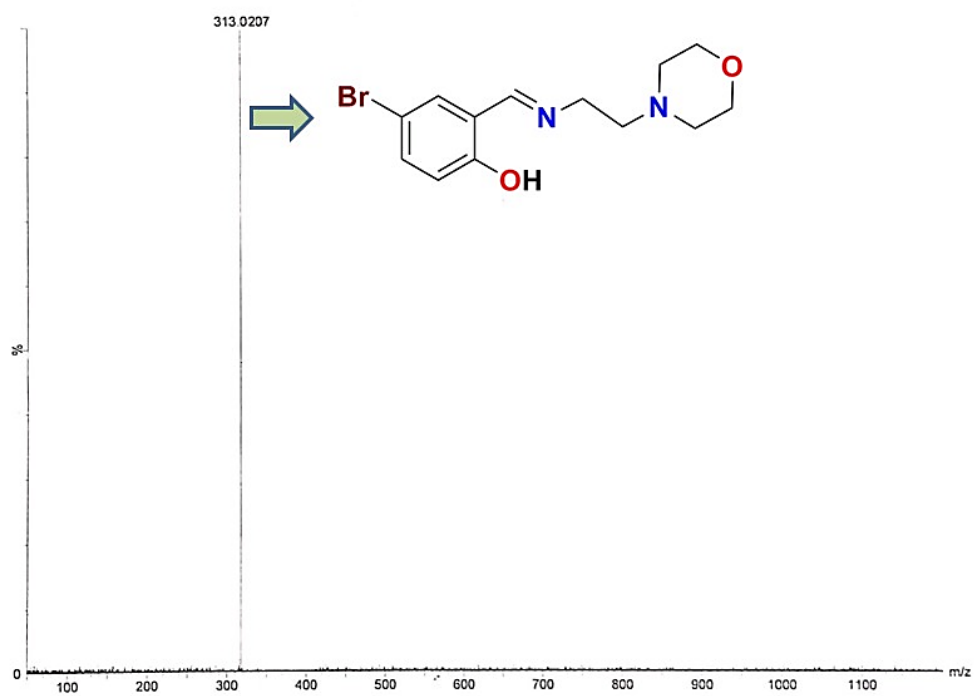

**Fig. S2** ESI mass spectrum of HL<sub>2</sub>.

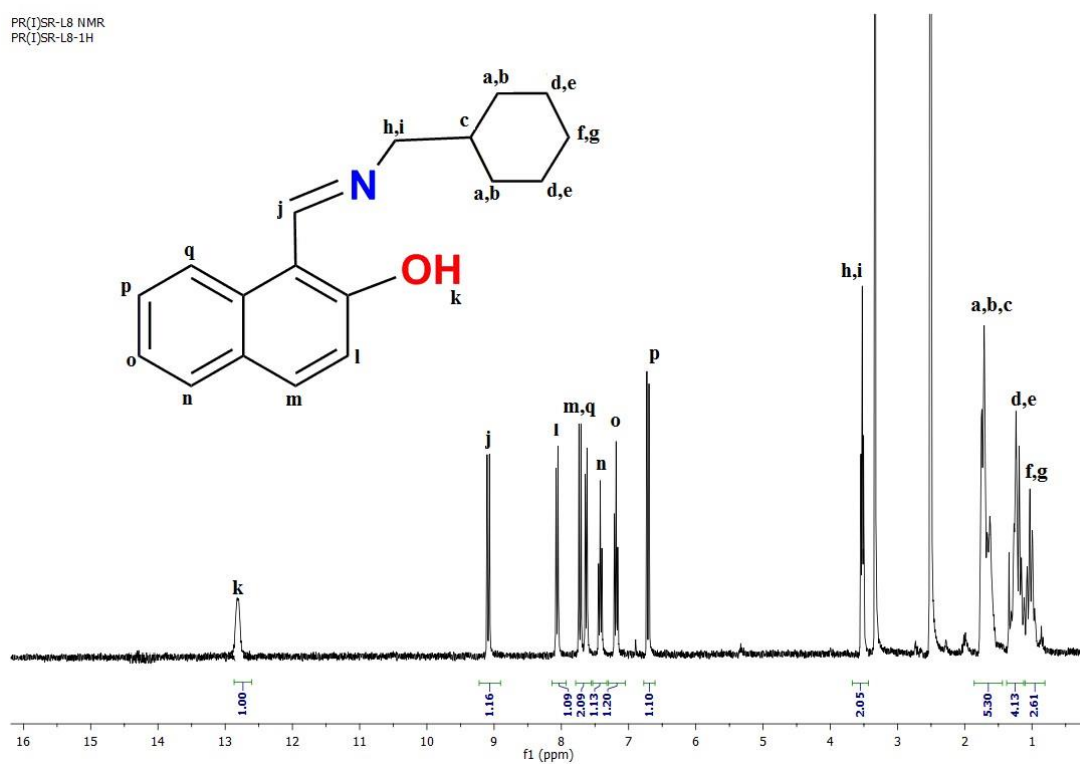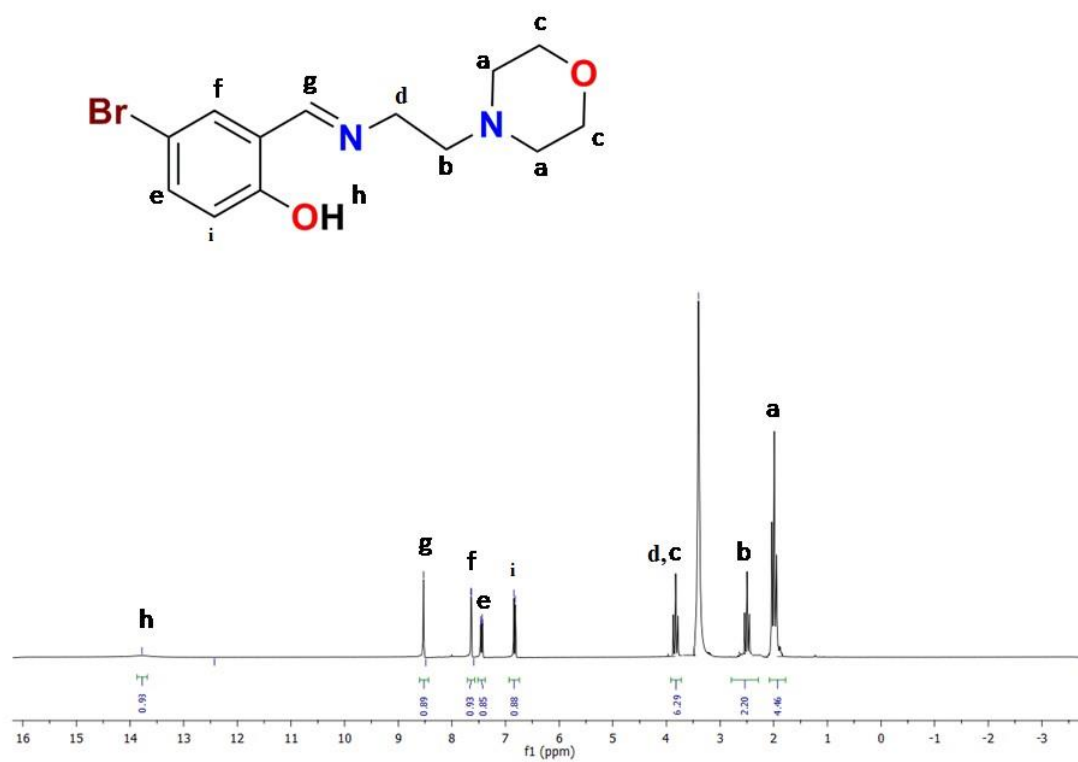

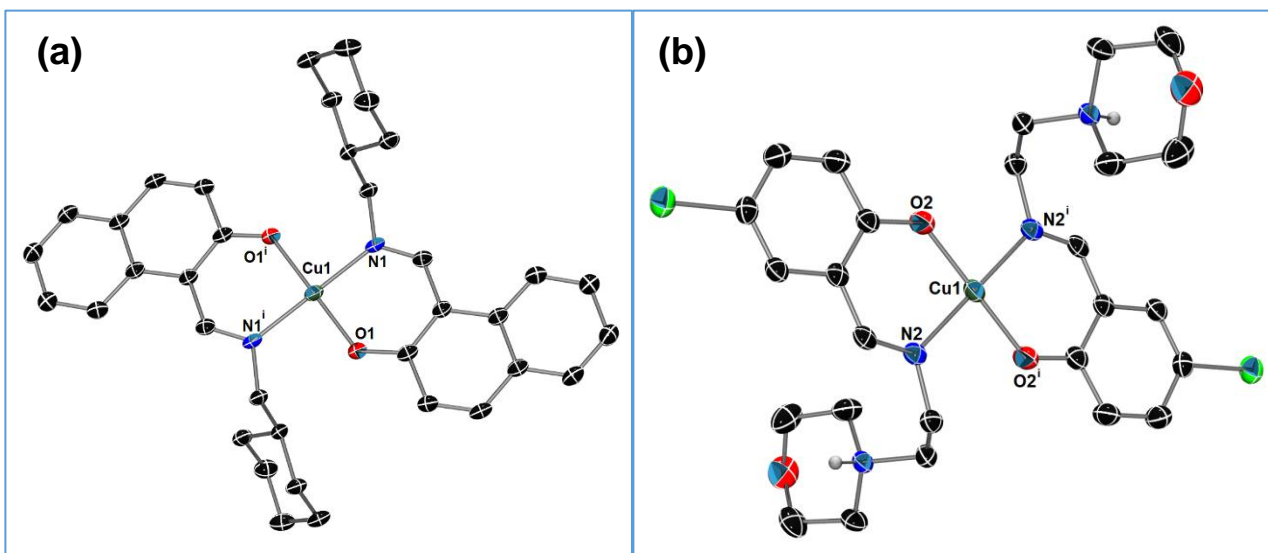

**Fig. S5** ORTEP view of (a) Complex 1 (40% thermal ellipsoids) and (b) Complex 2 (40% thermal ellipsoids) including the selective atom numbering scheme. Only the relevant hydrogen atoms are shown for clarity. Counter anions  $\text{NO}_3^-$  in (b) are not shown for clarity. Symmetry transformation for Complex 1:  $=^i = 2 -x, 1 -y, 1 -z$ . Symmetry transformation for Complex 2:  $=^i = 2 -x, 1 -y, 1 -z$ .

### UV-Vis Spectroscopy

The electronic spectra of Complex 1 and Complex 2 were recorded in DMF in the range of 200–700 nm at room temperature (Fig. S5 and S6). The UV-vis spectrum of Complex 1 exhibits an intense band at 309 nm with molar extinction coefficient of  $8360 \text{ M}^{-1} \text{ cm}^{-1}$  and one medium intensity band at 376–397 nm which may be attributed to the  $\text{O}^-$  of naphthalen-1-olate to copper(II) and N(imino) to Cu(II) LMCT (charge transfer from a molecular orbital of greater ligand character to a molecular orbital of greater metal character) and also due to the intraligand charge transfer transitions. For Complex 2, a high intensity band at 307 nm (molar extinction coefficient of  $6957 \text{ M}^{-1} \text{ cm}^{-1}$ ) and a band in the range 378–395 nm appears which correspond to the ligand to metal charge transfer transitions ( $\text{PhO}^-$  to Cu(II)) and N(imino) to Cu(II)) and intraligand charge transfer transitions too. Both the copper(II) complexes, centrosymmetric, show weak bands around 552–598 nm which clearly indicates the Laporte forbidden  $d-d$  transitions. These characteristic bands support the square planar geometry around the Cu(II) centres in both complexes.

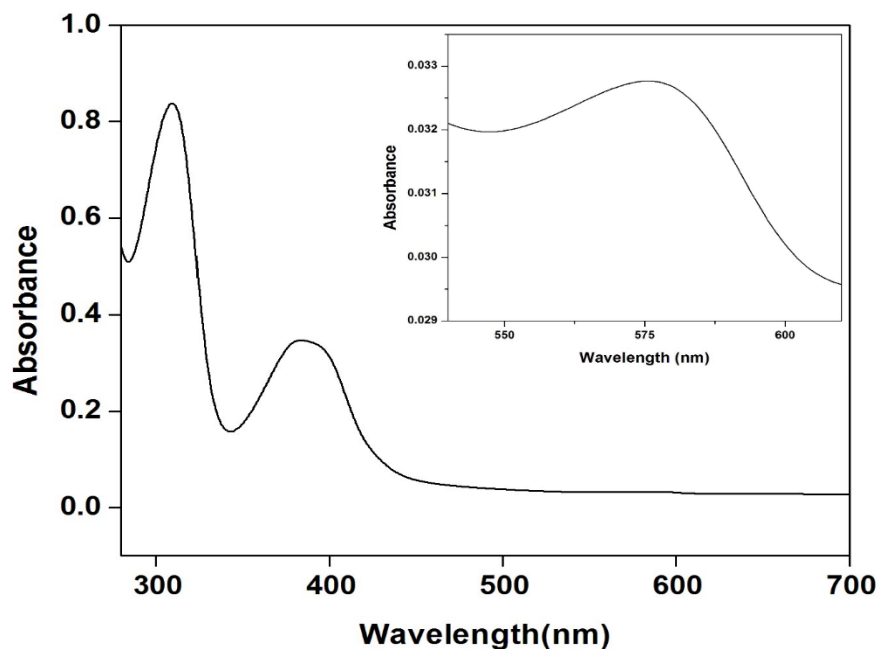

**Fig. S6** UV-vis spectrum of Complex 1 in DMF at room temperature. Spectrum in the range of 500-650 nm is shown in the inset.

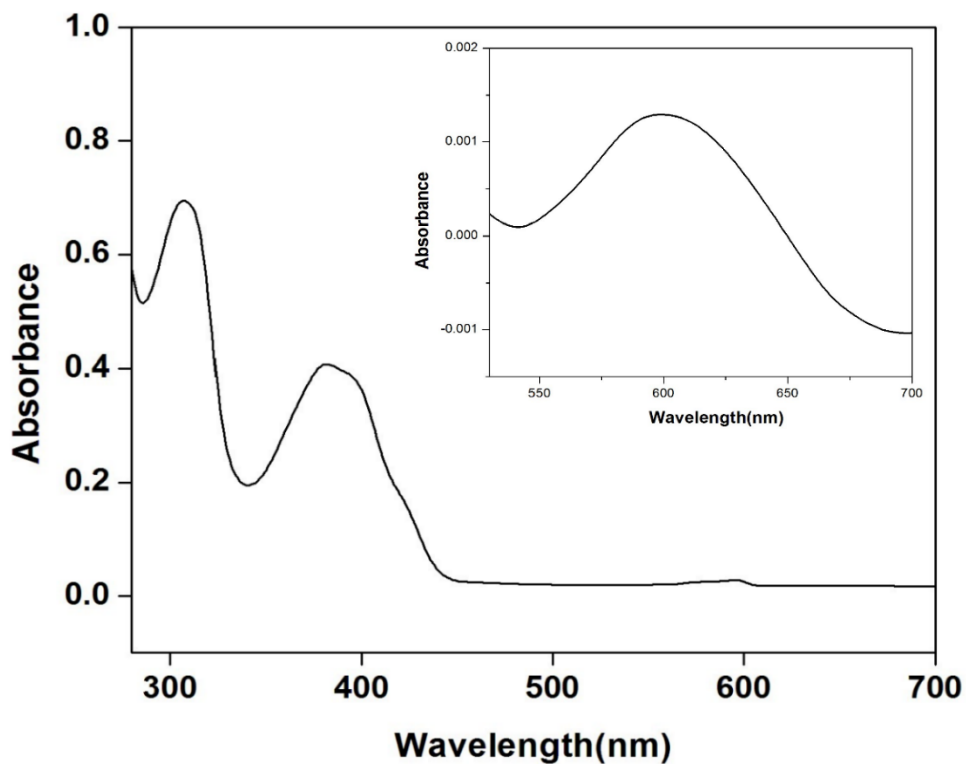

**Fig. S7** UV-vis spectrum of Complex 2 in DMF at room temperature. Spectrum in the range of 500-700 nm is shown in the inset.

## IR Spectroscopy

The FT-IR spectra of complexes 1 and 2 were obtained with solid samples by ATR technique (Fig. S8 and S9). HL<sub>1</sub> and HL<sub>2</sub> exhibit bands at 1615 and 1643 cm<sup>-1</sup> respectively indicating the formation of the Schiff bases. The intense bands at 1606 and 1616 cm<sup>-1</sup> for complexes 1 and 2 respectively indicate the presence of azomethine (C=N) moiety, characteristic of Schiff base, in the complexes. The symmetrical and unsymmetrical bands at 2800-3000 cm<sup>-1</sup> provide the evidence of presence of the methylene group.

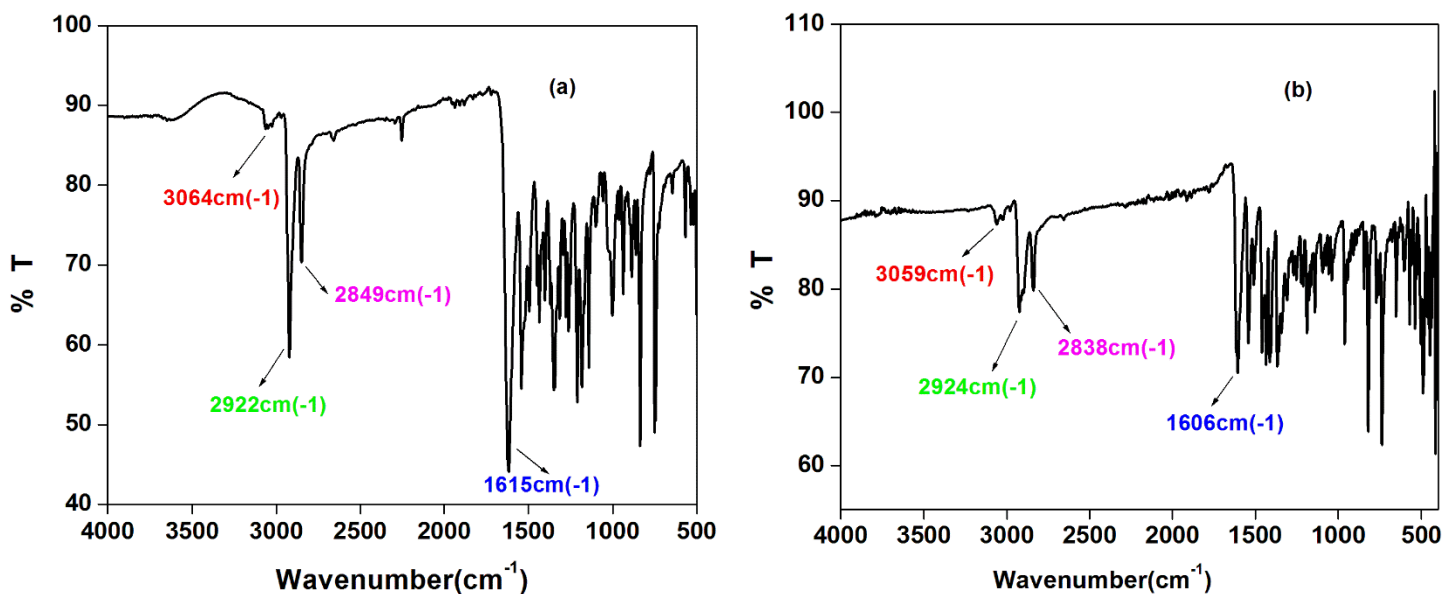

Fig. S8 FT-IR spectra of (a) HL<sub>1</sub> and (b) Complex 1.

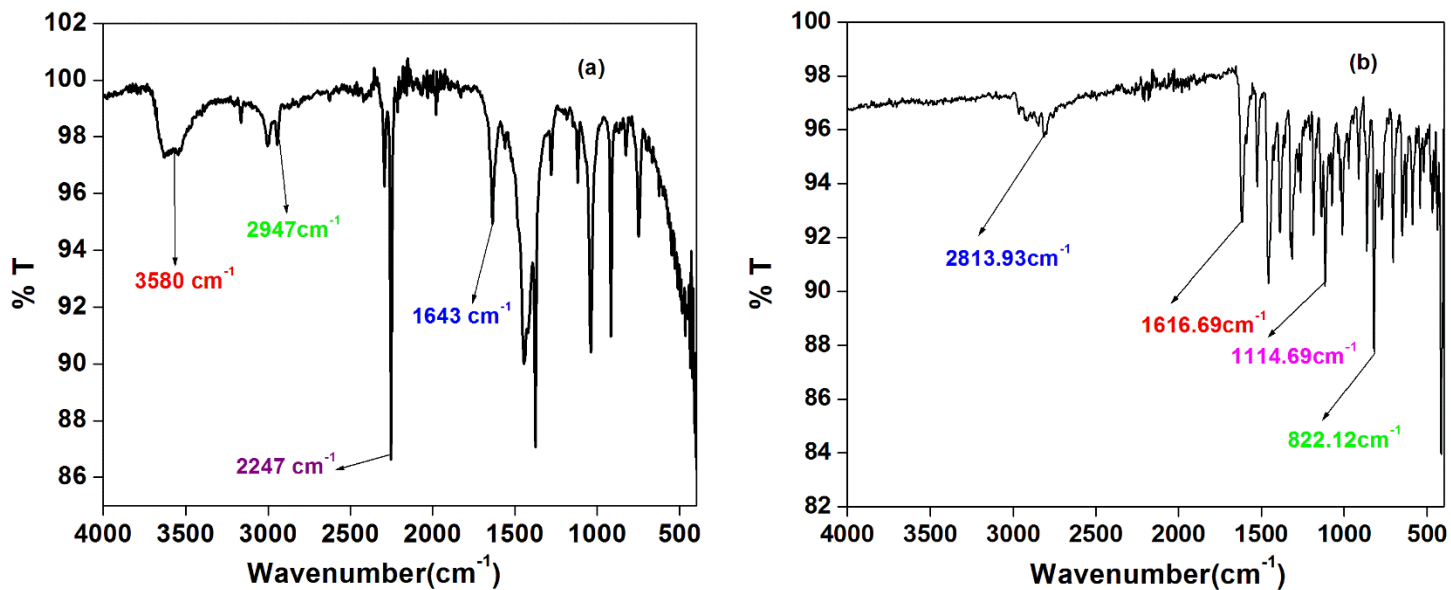

Fig. S9 FT-IR spectra of (a) HL<sub>2</sub> and (b) Complex 2.

## Mass Spectrometry

The ESI-mass spectrometric analysis of the two complexes was carried out in their methanolic solutions (Fig S10 and S11). For Complex 1, the  $m/z$  peak at 597.25 may be attributed to the  $[\text{Cu}(\text{L}_1)_2 + \text{H}^+]$  species (calculated value = 596.24). Similarly, the  $m/z$  peak at 814.93 for Complex 2 indicates the presence of  $[\text{Cu}(\text{L}_2)_2 + \text{H}^+]$  species (calculated values = 813.94).

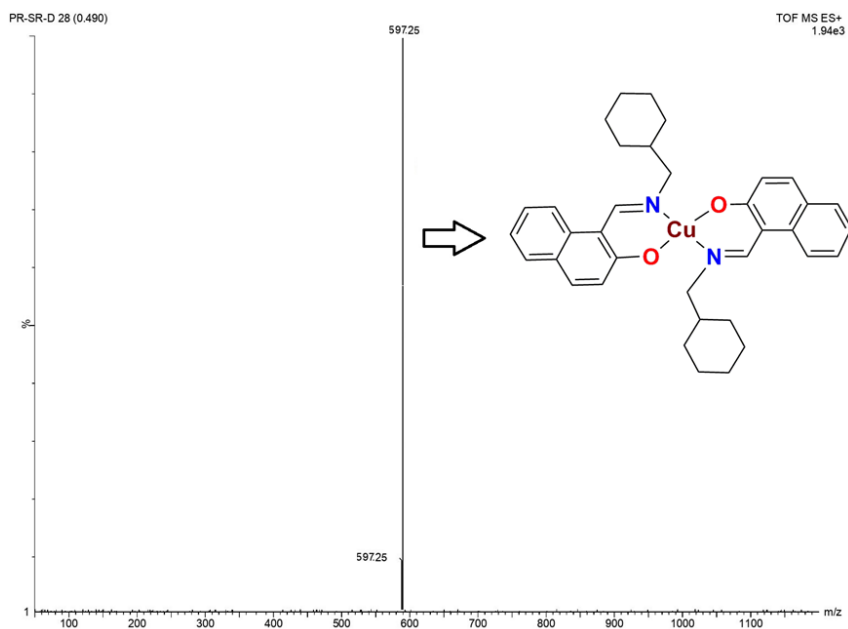

**Fig. S10** ESI mass spectrum of Complex 1.

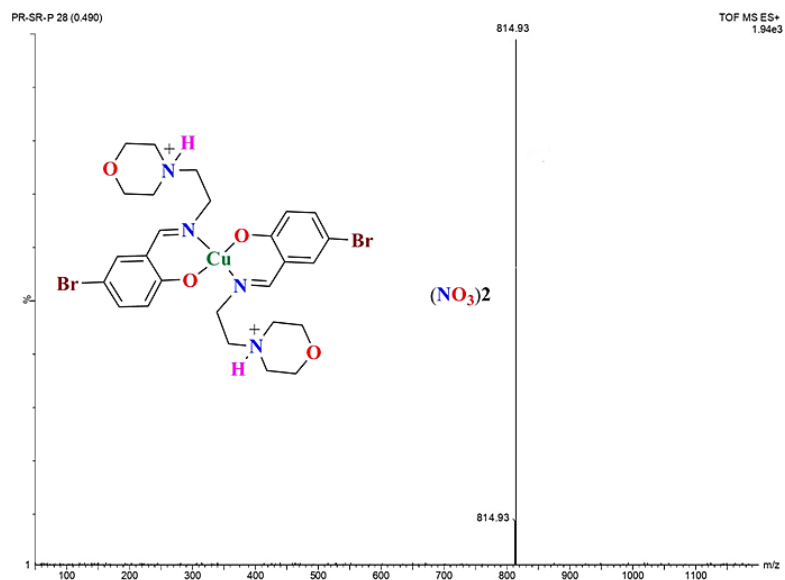

**Fig. S11** ESI mass spectrum of Complex 2.



## EPR studies

The synthesized copper complexes were subjected to X-band EPR spectroscopy at 77 K (Fig. S12). The  $g_1$  and  $A_1$  values of the synthesized copper complexes are provided in Table S2. The values are consistent with tetragonal copper complexes with a  $d_{x^2-y^2}$  ground state present in a square-planar or square-pyramidal geometry bound to a weak field ligand.

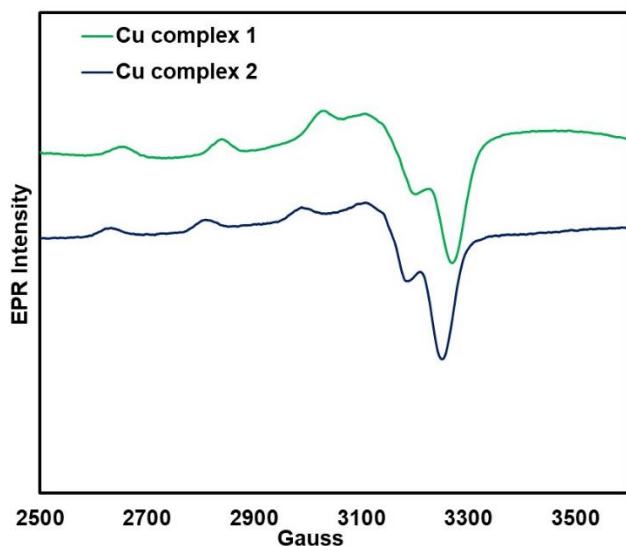

**Fig. S12** EPR spectra of Complex 1 and 2.

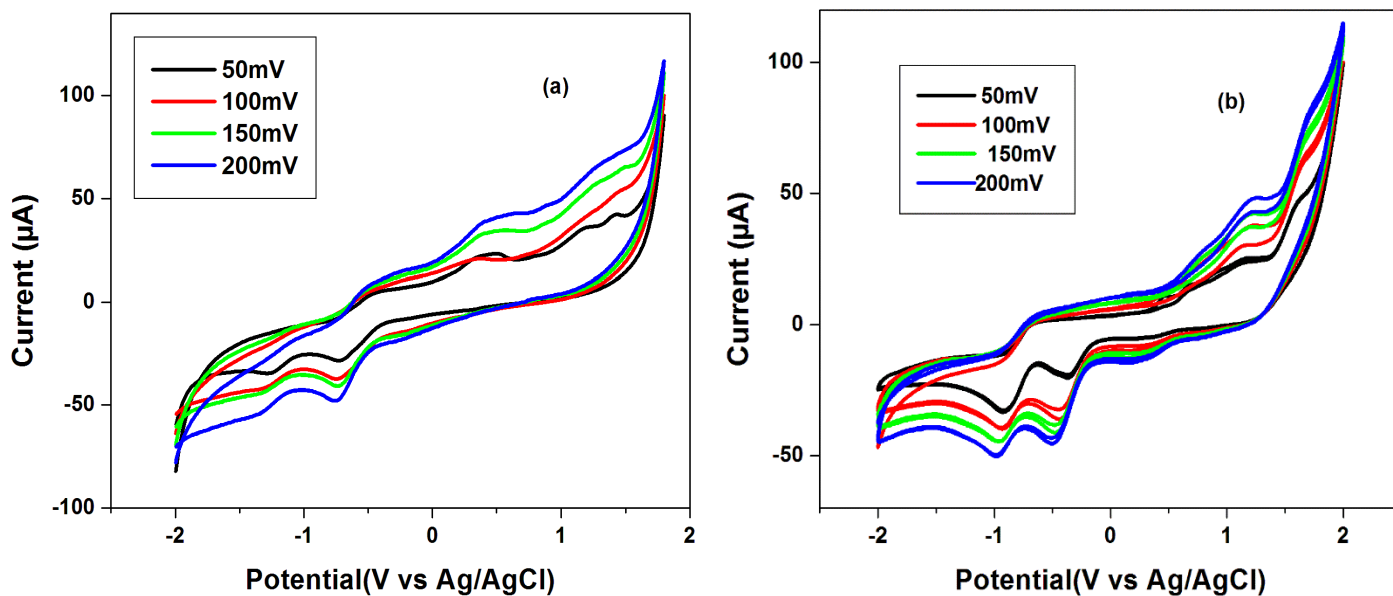

**Fig. S13** Scan rate dependence of  $10^{-4}$  M solution of (a) Complex 1 and (b) Complex 2 at scan rates from 50 to 200 mV/s in DMF with 0.1 M  $[n\text{-Bu}_4\text{N}](\text{ClO}_4)$  as supporting electrolyte.

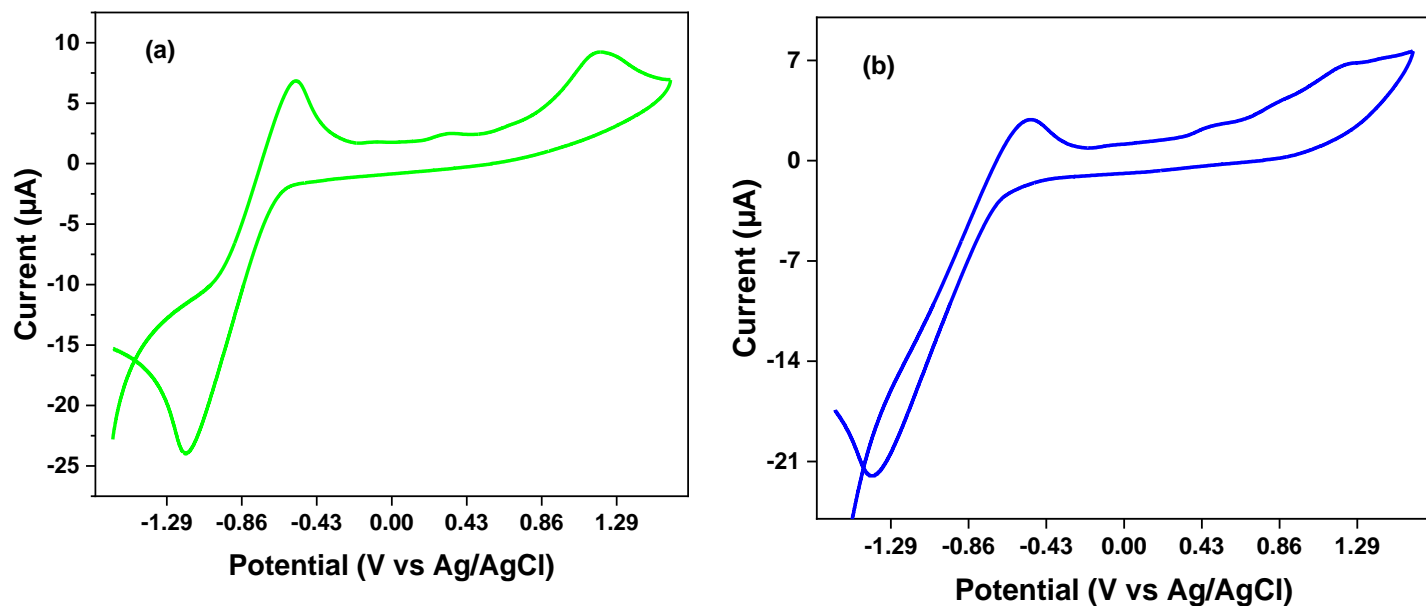

**Fig. S14** Cyclic voltammograms of (a) HL<sub>1</sub> and (b) HL<sub>2</sub> in air free DMF solution using a glassy carbon as working electrode, a saturated Ag/AgCl as reference electrode and a platinum wire as the auxiliary electrode with 0.1 M of [n-Bu<sub>4</sub>N]Br as supporting electrolyte at a scan rate of 50 mV/s.

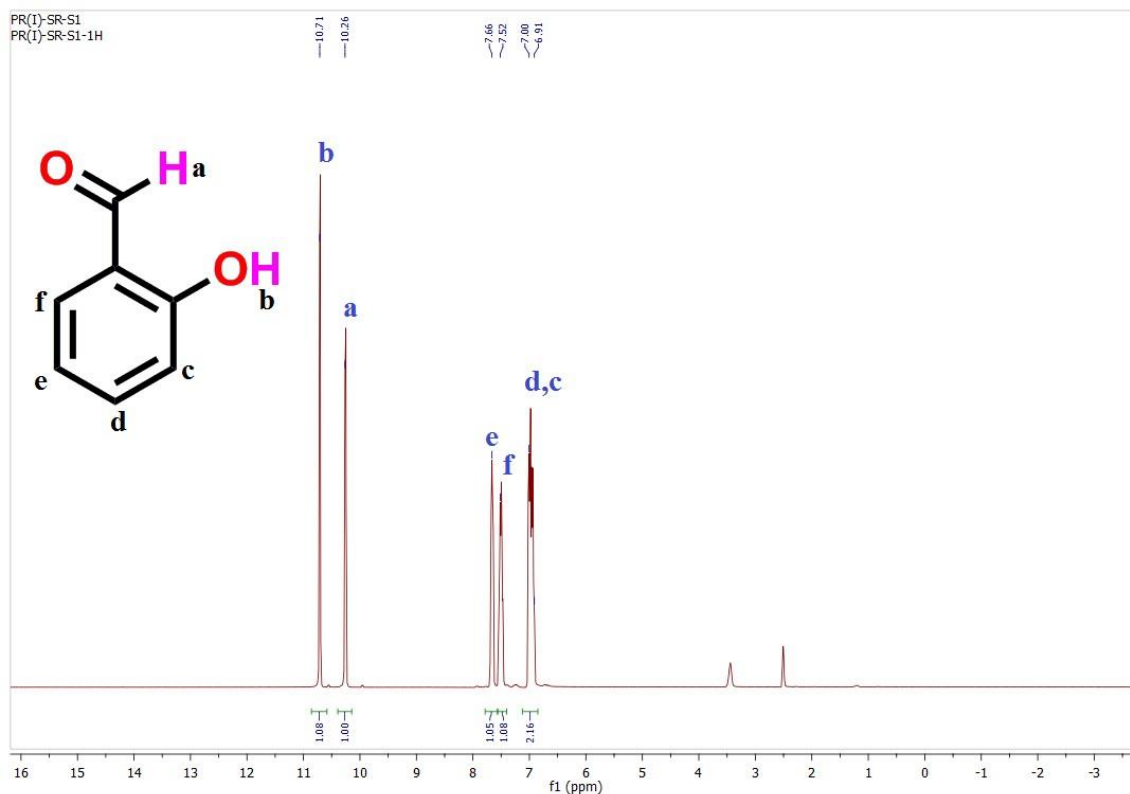

**Fig. S15** <sup>1</sup>H NMR spectrum of the product (2-hydroxybenzaldehyde) isolated from the reaction of 2-hydroxybenzyl alcohol catalyzed by Complex 1. Spectrum was recorded in DMSO-d<sub>6</sub>.

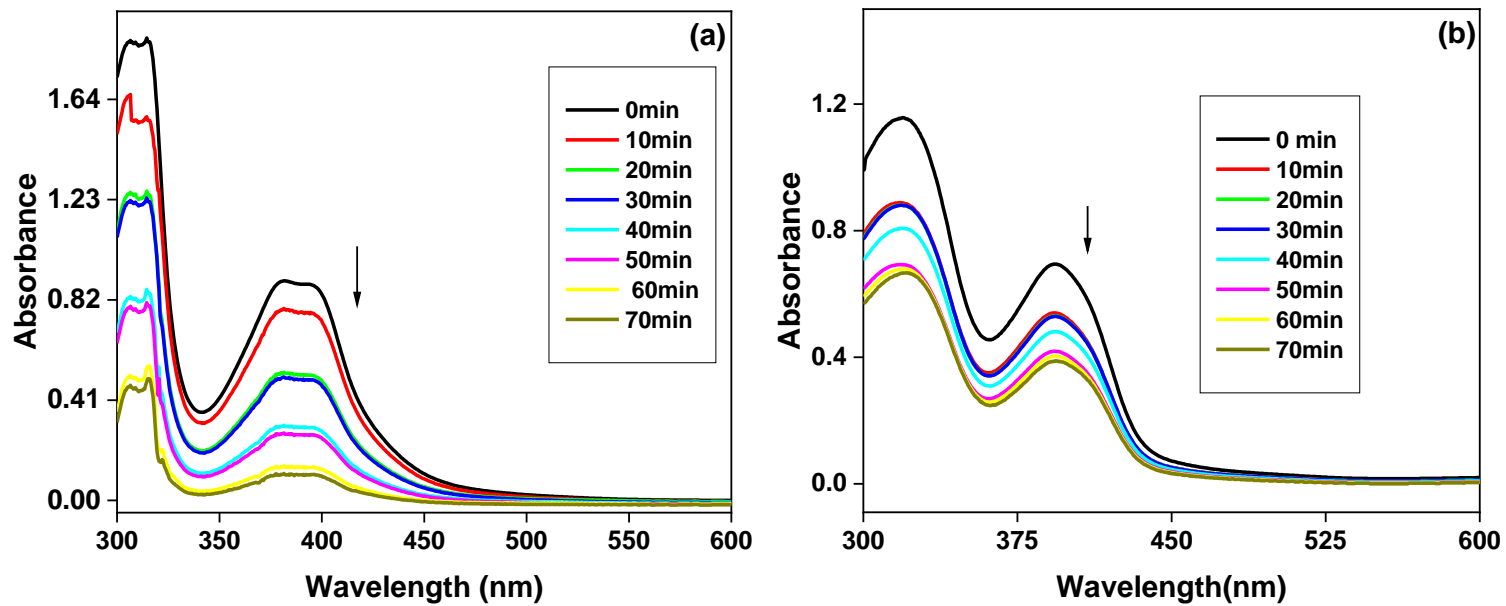

**Fig. S16** Absorbance of (a) Complex 1 and (b) Complex 2 with sodium hypochlorite at different time intervals. Absorbance decreases with the passage of time.

**Table S1** Selected bond distances (Å) and bond angles (°) of Complex 1 and 2

| Complex 1                                                                               |            | Complex 2                                                                               |          |
|-----------------------------------------------------------------------------------------|------------|-----------------------------------------------------------------------------------------|----------|
| Cu1–O1                                                                                  | 1.8936(19) | Cu1–O2                                                                                  | 1.893(2) |
| Cu1–N1                                                                                  | 1.993(2)   | Cu1–N2                                                                                  | 2.037(2) |
| Cu1–O1_a                                                                                | 1.8936(19) | Cu1–O2_a                                                                                | 1.893(2) |
| Cu1–N1_a                                                                                | 1.993(2)   | Cu1–N2_a                                                                                | 2.037(2) |
| O1–Cu1–N1                                                                               | 90.58(9)   | O2–Cu1–N2                                                                               | 91.80(9) |
| O1–Cu1–O1_a                                                                             | 180.00     | O2–Cu1–O2_a                                                                             | 180.00   |
| O1–Cu1–N1_a                                                                             | 89.42(9)   | O2–Cu1–N2_a                                                                             | 88.20(9) |
| O1_a–Cu1–N1                                                                             | 89.42(9)   | O2_a–Cu1–N2                                                                             | 88.20(9) |
| N1–Cu1–N1_a                                                                             | 180.00     | N2–Cu1–N2_a                                                                             | 180.00   |
| O1_a–Cu1–N1_a                                                                           | 90.58(9)   | O2_a–Cu1–N2_a                                                                           | 91.80(9) |
| Translation of Symmetry Code to Equiv. Pos<br>a = [ 2766.00 ] = [ 2_766 ] = 2-x,1-y,1-z |            | Translation of Symmetry Code to Equiv. Pos<br>a = [ 2766.00 ] = [ 2_766 ] = 2-x,1-y,1-z |          |

**Table S2** The  $g_l$  and  $A_l$  values of Complex 1 and Complex 2

| Complex   | $g_l$ | $A_l$ |
|-----------|-------|-------|
| Complex 1 | 2.22  | 181   |
| Complex 2 | 2.23  | 181   |

**Table S3** Oxidation of benzyl alcohol in various solvents

| Entry    | Catalyst | Yield(%) in MeOH | Yield(%) in DCM | Yield(%) in DMF |
|----------|----------|------------------|-----------------|-----------------|
| <b>1</b> | <b>1</b> | 49               | 65              | 57              |

**Table S4** The oxidation of benzyl alcohol in the presence of different oxidants

| Entry    | Catalyst | Yield(%)<br>in<br>presence<br>of<br>TBHP | Yield(%)<br>in<br>presence of H <sub>2</sub> O <sub>2</sub> | Yield(%)<br>in<br>presence of NaOCl |
|----------|----------|------------------------------------------|-------------------------------------------------------------|-------------------------------------|
| <b>1</b> | <b>1</b> | 65                                       | 78                                                          | 82                                  |

**Table S5** The oxidation of benzyl alcohol in the presence of NaOCl at different temperature

| Entry    | Catalyst         | Yield (%) |       |       |
|----------|------------------|-----------|-------|-------|
|          |                  | 313 K     | 333 K | 353 K |
| <b>1</b> | <b>Complex 1</b> | 82        | 73    | 65    |

**Table S6** Oxidation of alcohols using Complexes 1 and 2 as the catalyst in the presence of NaOCl oxidant. Yields the products were calculated after their isolation. Corresponding aldehyde was obtained as the sole product with both the catalysts.

| Substrates              | Yield % (TON) |              | Product isolated      |
|-------------------------|---------------|--------------|-----------------------|
|                         | Complex 1     | Complex 2    |                       |
| 2-Hydroxybenzyl alcohol | 72 (14.4)     | 51 (10.2)    | 2-Hydroxybenzaldehyde |
| 3-Hydroxybenzyl alcohol | 78 (15.6)     | 55 (11)      | 3-Hydroxybenzaldehyde |
| 2-Nitrobenzyl alcohol   | 68 (13.6)     | 39 (7.8)     | 2-nitrobenzaldehyde   |
| 3-Nitrobenzyl alcohol   | 66 (13.2)     | 37 (7.4)     | 3-nitrobenzaldehyde   |
| 1-Butanol               | Not detected  | Not detected | ---                   |

**Table S7** Optimized coordinates for Complex 1.

total energy = -3294.35461865152 Hartree

81

|    |            |           |            |
|----|------------|-----------|------------|
| Cu | 4.2722949  | 3.3629918 | 5.4514270  |
| O  | 3.9693541  | 3.8275074 | 7.2987669  |
| N  | 2.8348489  | 4.6457850 | 4.9178566  |
| C  | 1.9101206  | 5.0659161 | 5.7262249  |
| C  | 2.8682807  | 4.2266191 | 7.8471459  |
| C  | 1.7784639  | 4.7945622 | 7.1297902  |
| C  | 4.1522711  | 6.3977889 | 1.7804978  |
| H  | 4.1440471  | 5.4828580 | 1.1619457  |
| H  | 3.2436427  | 6.9716359 | 1.5126128  |
| C  | 0.5084861  | 5.0394726 | 9.2556737  |
| C  | 1.6382470  | 4.4977439 | 9.9460265  |
| H  | 1.5815889  | 4.3918563 | 11.0332981 |
| C  | 0.5708996  | 5.1873015 | 7.8326627  |
| C  | -1.7591713 | 5.9348715 | 9.3031606  |
| H  | -2.6556668 | 6.2249348 | 9.8565746  |
| C  | 5.3958140  | 7.2386644 | 1.4641184  |
| H  | 6.2987648  | 6.6198086 | 1.6266854  |
| H  | 5.3978487  | 7.5268586 | 0.3980131  |
| C  | 2.7651648  | 4.1089367 | 9.2787856  |
| H  | 3.6254898  | 3.6912488 | 9.8056800  |
| C  | -0.6587763 | 5.4195187 | 9.9640030  |
| H  | -0.6730221 | 5.2946383 | 11.0504423 |
| C  | -0.5835327 | 5.7057922 | 7.1844540  |
| H  | -0.6062888 | 5.8104163 | 6.0994563  |

|   |            |            |            |
|---|------------|------------|------------|
| C | 5.4710706  | 8.4865152  | 2.3544001  |
| H | 4.6256701  | 9.1579392  | 2.1092815  |
| H | 6.3957417  | 9.0524451  | 2.1432326  |
| C | -1.7129616 | 6.0731086  | 7.8988691  |
| H | -2.5804481 | 6.4680167  | 7.3630338  |
| C | 5.4023129  | 8.1141879  | 3.8416072  |
| H | 5.4090703  | 9.0249784  | 4.4661199  |
| H | 6.3072967  | 7.5379743  | 4.1135401  |
| C | 4.1599108  | 7.2695767  | 4.1554422  |
| H | 3.2494013  | 7.8794790  | 3.9926501  |
| H | 4.1608711  | 6.9798820  | 5.2204383  |
| C | 2.8445442  | 5.1621657  | 3.5518269  |
| H | 1.9331749  | 5.7634220  | 3.3749146  |
| H | 2.8395897  | 4.3074981  | 2.8614450  |
| C | 4.0874778  | 6.0177822  | 3.2679831  |
| H | 4.9720052  | 5.3931363  | 3.4867648  |
| H | 1.1553751  | 5.7326829  | 5.2889906  |
| O | 4.5613351  | 2.8827716  | 3.6055482  |
| N | 5.7257098  | 2.0965336  | 5.9822344  |
| C | 6.6503158  | 1.6850767  | 5.1692634  |
| C | 5.6638924  | 2.4968471  | 3.0507729  |
| C | 6.7680401  | 1.9510758  | 3.7633978  |
| C | 4.4562490  | 0.3330770  | 9.1328128  |
| H | 4.4507270  | 1.2506329  | 9.7475729  |
| H | 5.3766927  | -0.2226550 | 9.3985871  |
| C | 8.0256830  | 1.7121520  | 1.6296272  |
| C | 6.8820358  | 2.2306663  | 0.9443260  |
| H | 6.9286392  | 2.3298254  | -0.1440539 |

|   |            |            |            |
|---|------------|------------|------------|
| C | 7.9763966  | 1.5731278  | 3.0540292  |
| C | 10.3071533 | 0.8532259  | 1.5710895  |
| H | 11.2039113 | 0.5734494  | 1.0128213  |
| C | 3.2301482  | -0.5293708 | 9.4590618  |
| H | 2.3149870  | 0.0717474  | 9.2981521  |
| H | 3.2386240  | -0.8127464 | 10.5264291 |
| C | 5.7540742  | 2.6059639  | 1.6175754  |
| H | 4.8832412  | 3.0061389  | 1.0943903  |
| C | 9.1937406  | 1.3463910  | 0.9151105  |
| H | 9.1980851  | 1.4644990  | -0.1721717 |
| C | 9.1439679  | 1.0782046  | 3.6970818  |
| H | 9.1765738  | 0.9820906  | 4.7826268  |
| C | 3.1739564  | -1.7823700 | 8.5746278  |
| H | 4.0329662  | -2.4367397 | 8.8185419  |
| H | 2.2610757  | -2.3645526 | 8.7928061  |
| C | 10.2738022 | 0.7241727  | 2.9766344  |
| H | 11.1516074 | 0.3471426  | 3.5085280  |
| C | 3.2285240  | -1.4154277 | 7.0854921  |
| H | 3.2358632  | -2.3289923 | 6.4650463  |
| H | 2.3115317  | -0.8575766 | 6.8154997  |
| C | 4.4532688  | -0.5489964 | 6.7618121  |
| H | 5.3758383  | -1.1410354 | 6.9226838  |
| H | 4.4415963  | -0.2641597 | 5.6955790  |
| C | 5.7320734  | 1.5851259  | 7.3501081  |
| H | 6.6552121  | 1.0013650  | 7.5246261  |
| H | 5.7245795  | 2.4421459  | 8.0374351  |
| C | 4.5065340  | 0.7078755  | 7.6434362  |
| H | 3.6098648  | 1.3154528  | 7.4263619  |



H 7.4170472 1.0304312 5.6040287

**Table S8** Optimized coordinates for Complex 1 OCl.

total energy = -3829.54615319704 Hartree

83

Cu 5.2022446 4.0016672 5.4034199

O 5.0413663 4.6479082 7.2599090

N 3.2384198 4.5749600 5.1243259

C 2.3880974 4.7374814 6.0787262

C 3.9839053 4.6010720 7.9878119

C 2.6438451 4.5608178 7.4902365

C 3.5478957 6.2463577 1.7051391

C 1.7729606 4.3560635 9.8135290

C 3.1160039 4.4870930 10.2870427

C 1.5353191 4.3976175 8.4006827

C -0.6012327 4.0121672 10.2595159

C 4.5658158 7.2323326 1.1149172

C 4.1661642 4.6070620 9.4224168

C 0.6965255 4.1680945 10.7143651

C 0.1903058 4.2186724 7.9676235

C 4.6245735 8.5351047 1.9253787

C -0.8459782 4.0359063 8.8685994

C 4.8846972 8.2597597 3.4131374

C 3.8589208 7.2770252 3.9917695

C 2.8723795 4.9267806 3.7636131

C 3.8386058 5.9710713 3.1867023

O 5.2374198 3.1922467 3.5957583

|    |            |            |            |
|----|------------|------------|------------|
| N  | 5.9263697  | 2.0861814  | 6.0191388  |
| C  | 6.7947104  | 1.4759681  | 5.2929820  |
| C  | 6.3405746  | 2.6813299  | 3.1704652  |
| C  | 7.2106191  | 1.8759845  | 3.9642836  |
| C  | 3.4281315  | 0.7685063  | 8.5824963  |
| C  | 8.7616057  | 1.6242192  | 2.0361405  |
| C  | 7.8441830  | 2.3853893  | 1.2470546  |
| C  | 8.4410068  | 1.3730581  | 3.4121331  |
| C  | 10.8658669 | 0.4050447  | 2.2496256  |
| C  | 1.9002149  | 0.6215723  | 8.5809060  |
| C  | 6.6926735  | 2.8885491  | 1.7859785  |
| C  | 9.9698658  | 1.1301964  | 1.4838068  |
| C  | 9.3967315  | 0.6413842  | 4.1757480  |
| C  | 1.4210216  | -0.2562072 | 7.4165641  |
| C  | 10.5689492 | 0.1667328  | 3.6113743  |
| C  | 1.9463502  | 0.2643377  | 6.0712389  |
| C  | 3.4748417  | 0.4016271  | 6.0748205  |
| C  | 5.4689518  | 1.4880669  | 7.2541436  |
| C  | 3.9461347  | 1.2891214  | 7.2342851  |
| O  | 6.7285762  | 5.2300122  | 4.9159449  |
| Cl | 8.1744006  | 4.7799803  | 5.7474650  |
| H  | 3.5677380  | 5.2975271  | 1.1384446  |
| H  | 2.5262683  | 6.6623762  | 1.5963645  |
| H  | 3.2914985  | 4.4720865  | 11.3672741 |
| H  | -1.4244976 | 3.8626768  | 10.9628658 |
| H  | 5.5651598  | 6.7573388  | 1.1205861  |
| H  | 4.3228372  | 7.4486801  | 0.0588126  |
| H  | 5.1953332  | 4.6866663  | 9.7804334  |

|   |            |            |            |
|---|------------|------------|------------|
| H | 0.9139129  | 4.1413690  | 11.7864577 |
| H | -0.0416496 | 4.1961596  | 6.9024367  |
| H | 3.6603487  | 9.0698514  | 1.8192293  |
| H | 5.4027570  | 9.2041800  | 1.5155526  |
| H | -1.8642224 | 3.8970382  | 8.4938043  |
| H | 4.8746507  | 9.2065643  | 3.9830372  |
| H | 5.8911664  | 7.8195371  | 3.5389860  |
| H | 2.8494247  | 7.7365432  | 3.9778972  |
| H | 4.1030941  | 7.0594346  | 5.0444974  |
| H | 1.8281120  | 5.2987934  | 3.7238489  |
| H | 2.9487095  | 4.0167103  | 3.1478135  |
| H | 4.8457215  | 5.5273846  | 3.2468328  |
| H | 1.3770417  | 5.0775479  | 5.8016583  |
| H | 3.7393269  | 1.4557857  | 9.3890792  |
| H | 3.8931346  | -0.2141889 | 8.7985628  |
| H | 8.0891545  | 2.5712400  | 0.1965261  |
| H | 11.7958078 | 0.0303705  | 1.8139087  |
| H | 1.4432566  | 1.6231530  | 8.4946344  |
| H | 1.5577932  | 0.2007366  | 9.5435178  |
| H | 5.9958137  | 3.4827889  | 1.1892739  |
| H | 10.1842000 | 1.3385785  | 0.4310530  |
| H | 9.2218509  | 0.4648933  | 5.2378379  |
| H | 1.7815523  | -1.2925597 | 7.5679329  |
| H | 0.3170491  | -0.3047339 | 7.4043640  |
| H | 11.2777647 | -0.3890876 | 4.2321997  |
| H | 1.6235753  | -0.4013291 | 5.2504030  |
| H | 1.5006379  | 1.2568568  | 5.8681122  |
| H | 3.9387739  | -0.6015964 | 6.1632236  |

|   |           |           |           |
|---|-----------|-----------|-----------|
| H | 3.8193175 | 0.8364306 | 5.1216175 |
| H | 5.9766769 | 0.5181521 | 7.4396838 |
| H | 5.7200198 | 2.1712492 | 8.0838719 |
| H | 3.4982112 | 2.2811585 | 7.0745984 |
| H | 7.2264300 | 0.5379627 | 5.6842886 |

**Table S9** Optimized coordinates for Complex 1=O.

total energy = -3369.49226894376 Hartree

82

|    |            |           |            |
|----|------------|-----------|------------|
| Cu | 5.8058874  | 4.2844192 | 5.7860078  |
| O  | 5.4092668  | 4.7136085 | 7.6436898  |
| N  | 3.8298204  | 4.4268425 | 5.3644709  |
| C  | 2.8820351  | 4.5835610 | 6.2304159  |
| C  | 4.2851102  | 4.7176327 | 8.2700682  |
| C  | 2.9990239  | 4.6318097 | 7.6605033  |
| C  | 3.6981167  | 5.6719914 | 1.7534012  |
| C  | 1.9220327  | 4.6493389 | 9.9043675  |
| C  | 3.2236175  | 4.7872416 | 10.4825365 |
| C  | 1.8041584  | 4.5779312 | 8.4787377  |
| C  | -0.4909403 | 4.4154932 | 10.1771126 |
| C  | 4.1136268  | 6.9681409 | 1.0448495  |
| C  | 4.3477764  | 4.8256036 | 9.7098678  |
| C  | 0.7703518  | 4.5693568 | 10.7248058 |
| C  | 0.4923300  | 4.4155472 | 7.9512684  |
| C  | 3.3625339  | 8.1829975 | 1.6064380  |
| C  | -0.6200365 | 4.3377158 | 8.7737140  |
| C  | 3.5350195  | 8.2875883 | 3.1277382  |
| C  | 3.1168499  | 6.9898226 | 3.8324848  |

|   |            |            |            |
|---|------------|------------|------------|
| C | 3.4633306  | 4.4583472  | 3.9548805  |
| C | 3.8732517  | 5.7744806  | 3.2760348  |
| O | 6.1872735  | 3.9280411  | 3.9563906  |
| N | 5.9768625  | 1.9287969  | 5.9292162  |
| C | 6.8493991  | 1.3532081  | 5.1835261  |
| C | 7.1782463  | 3.2103769  | 3.5304308  |
| C | 7.5452983  | 1.9357875  | 4.0475325  |
| C | 3.3522248  | 0.5756676  | 8.3610110  |
| C | 9.2877927  | 1.7377296  | 2.2701469  |
| C | 8.8889576  | 3.0167408  | 1.7797714  |
| C | 8.6185616  | 1.1942887  | 3.4200317  |
| C | 10.7390381 | -0.2186044 | 2.1051296  |
| C | 1.8303312  | 0.7451649  | 8.4714007  |
| C | 7.8898873  | 3.7230321  | 2.3892635  |
| C | 10.3331445 | 1.0167365  | 1.6375147  |
| C | 9.0776114  | -0.0776110 | 3.8786348  |
| C | 1.1190922  | 0.2916371  | 7.1886879  |
| C | 10.0980943 | -0.7620841 | 3.2420512  |
| C | 1.6880963  | 0.9984001  | 5.9502602  |
| C | 3.2092790  | 0.8256128  | 5.8480440  |
| C | 5.4356808  | 1.1838106  | 7.0452848  |
| C | 3.9109536  | 1.2986556  | 7.1273665  |
| O | 7.4920153  | 4.5996733  | 6.0576403  |
| H | 4.2930989  | 4.8233192  | 1.3720699  |
| H | 2.6374202  | 5.4511781  | 1.5203244  |
| H | 3.3046942  | 4.8519280  | 11.5719021 |
| H | -1.3737265 | 4.3506966  | 10.8182397 |
| H | 5.2012477  | 7.1195961  | 1.1828004  |
| H | 3.9421601  | 6.8800747  | -0.0429746 |
| H | 5.3425972  | 4.9187626  | 10.1510307 |
| H | 0.8996884  | 4.6274516  | 11.8096250 |

|   |            |            |           |
|---|------------|------------|-----------|
| H | 0.3366659  | 4.3330654  | 6.8760876 |
| H | 2.2852569  | 8.0846434  | 1.3696693 |
| H | 3.7108219  | 9.1095405  | 1.1157162 |
| H | -1.6089054 | 4.2087682  | 8.3246767 |
| H | 2.9533211  | 9.1397695  | 3.5224066 |
| H | 4.5971230  | 8.4954513  | 3.3586761 |
| H | 2.0278483  | 6.8336935  | 3.6968731 |
| H | 3.2916387  | 7.0812312  | 4.9183369 |
| H | 2.3712513  | 4.3116622  | 3.8463709 |
| H | 3.9823373  | 3.6288180  | 3.4571148 |
| H | 4.9487445  | 5.9123659  | 3.4738803 |
| H | 1.8675761  | 4.6861667  | 5.8243364 |
| H | 3.8421623  | 0.9619630  | 9.2733754 |
| H | 3.5999324  | -0.5028797 | 8.2986902 |
| H | 9.4064008  | 3.4284456  | 0.9079094 |
| H | 11.5457744 | -0.7659172 | 1.6106612 |
| H | 1.5982337  | 1.8087351  | 8.6574649 |
| H | 1.4459730  | 0.1798327  | 9.3395592 |
| H | 7.5824760  | 4.7062284  | 2.0254777 |
| H | 10.8169469 | 1.4650074  | 0.7645270 |
| H | 8.6306398  | -0.5377003 | 4.7589532 |
| H | 1.2454762  | -0.8022358 | 7.0694454 |
| H | 0.0328513  | 0.4775250  | 7.2697652 |
| H | 10.4138789 | -1.7344626 | 3.6309105 |
| H | 1.1968710  | 0.6213375  | 5.0351147 |
| H | 1.4529992  | 2.0771749  | 6.0122816 |
| H | 3.4498335  | -0.2420965 | 5.6697612 |
| H | 3.6031192  | 1.3911898  | 4.9869936 |
| H | 5.7389911  | 0.1138262  | 7.0061641 |
| H | 5.8595433  | 1.6108906  | 7.9739779 |
| H | 3.6833217  | 2.3656741  | 7.2461378 |

H 7.1108638 0.3081883 5.4216251

**Table S10** Optimized coordinates for Complex 2.

total energy = -8317.48168396066 Hartree

71

Br -1.1083600 6.3485731 6.2717494

Cu 5.8218519 3.6463823 5.6978379

O 4.7050189 4.7746529 6.7637321

O 6.2366828 8.2046222 1.5246375

N 5.6215923 5.4233306 1.8967634

N 4.5009771 3.7309499 4.1616016

C 3.2818070 4.1626380 4.2909211

C 2.7012233 4.8046036 5.4332861

C 5.9420649 6.3484537 3.0508414

H 7.0227898 6.2569266 3.2253740

H 5.3998264 6.0001250 3.9375794

C 1.4563070 6.1504503 7.5609888

H 0.9702589 6.6749754 8.3856774

C 2.7885365 5.7897673 7.6631899

H 3.3589834 6.0298290 8.5626705

C 5.9013472 7.4011272 0.4132246

H 6.4568373 7.7816367 -0.4558629

H 4.8175196 7.4773286 0.1914911

C 5.5686567 7.7806408 2.6916520

H 4.4700599 7.8709829 2.5687775

H 5.8763664 8.4412465 3.5149440

C 5.9884936 3.9813926 2.1682293

H 6.9113226 3.9868883 2.7598121

H 6.1942681 3.5146434 1.1956502

C 0.7264447 5.8428220 6.3937969

|    |            |            |            |
|----|------------|------------|------------|
| C  | 1.3370925  | 5.1850070  | 5.3456145  |
| H  | 0.7795636  | 4.9513725  | 4.4368619  |
| C  | 4.8805972  | 3.1927332  | 2.8575567  |
| H  | 3.9968056  | 3.1426849  | 2.1978044  |
| H  | 5.2697315  | 2.1736251  | 2.9844922  |
| C  | 3.4555581  | 5.1003858  | 6.6126687  |
| C  | 6.2859829  | 5.9449451  | 0.6418543  |
| H  | 5.9646309  | 5.3091070  | -0.1938130 |
| H  | 7.3683938  | 5.8336927  | 0.7956029  |
| H  | 2.6077544  | 4.0527454  | 3.4272850  |
| H  | 4.6060731  | 5.4652439  | 1.7342830  |
| Br | 12.7543173 | 0.9507235  | 5.1235250  |
| O  | 6.9398977  | 2.5205298  | 4.6308050  |
| O  | 5.3930726  | -0.9124284 | 9.8698496  |
| N  | 6.0144045  | 1.8679604  | 9.5004330  |
| N  | 7.1416182  | 3.5601471  | 7.2348691  |
| C  | 8.3611702  | 3.1295401  | 7.1055641  |
| C  | 8.9428257  | 2.4897056  | 5.9625637  |
| C  | 5.7008955  | 0.9425731  | 8.3446417  |
| H  | 4.6215934  | 1.0355828  | 8.1622587  |
| H  | 6.2499573  | 1.2895568  | 7.4616180  |
| C  | 10.1898782 | 1.1477391  | 3.8336442  |
| H  | 10.6766747 | 0.6244577  | 3.0086065  |
| C  | 8.8574362  | 1.5075466  | 3.7312567  |
| H  | 8.2876029  | 1.2681722  | 2.8312023  |
| C  | 5.7217553  | -0.1087118 | 10.9830863 |
| H  | 5.1597532  | -0.4879078 | 11.8485502 |
| H  | 6.8039251  | -0.1861523 | 11.2123401 |
| C  | 6.0696918  | -0.4899578 | 8.7072464  |
| H  | 7.1672616  | -0.5817884 | 8.8377951  |
| H  | 5.7667777  | -1.1506374 | 7.8822309  |



|   |            |           |            |
|---|------------|-----------|------------|
| C | 5.6506176  | 3.3100674 | 9.2262050  |
| H | 4.7292565  | 3.3052864 | 8.6323131  |
| H | 5.4429980  | 3.7780502 | 10.1978098 |
| C | 10.9189819 | 1.4545848 | 5.0015229  |
| C | 10.3072404 | 2.1103326 | 6.0503542  |
| H | 10.8641288 | 2.3431786 | 6.9597008  |
| C | 6.7611479  | 4.0969790 | 8.5392353  |
| H | 7.6440926  | 4.1445448 | 9.2003254  |
| H | 6.3741732  | 5.1170376 | 8.4132049  |
| C | 8.1893983  | 2.1952489 | 4.7822590  |
| C | 5.3405211  | 1.3477813 | 10.7509114 |
| H | 5.6566034  | 1.9837666 | 11.5884690 |
| H | 4.2593502  | 1.4601740 | 10.5893895 |
| H | 9.0346968  | 3.2387188 | 7.9696856  |
| H | 7.0287241  | 1.8251557 | 9.6699875  |

**Table S11** Optimized coordinates for Complex 2OCl.

total energy = -8852.71466155198 Hartree

73

|    |            |           |           |
|----|------------|-----------|-----------|
| Br | -0.5374469 | 4.8650649 | 7.1547397 |
| Cu | 6.8632529  | 4.5376489 | 5.6501301 |
| O  | 5.4678797  | 5.4169903 | 6.7042267 |
| O  | 5.0959129  | 7.8644566 | 1.0551446 |
| N  | 5.4962184  | 5.1466113 | 1.8968640 |
| N  | 5.2857715  | 3.6505655 | 4.4614543 |
| C  | 4.0255678  | 3.7356078 | 4.7348012 |
| C  | 3.4291278  | 4.4542674 | 5.8319813 |
| C  | 5.7277232  | 6.3252686 | 2.8195942 |
| C  | 2.0724704  | 5.8626575 | 7.8585829 |

|    |            |            |            |
|----|------------|------------|------------|
| C  | 3.4438691  | 5.9880803  | 7.7316790  |
| C  | 4.8253312  | 6.8008086  | 0.1687668  |
| C  | 4.8539859  | 7.4950780  | 2.3975454  |
| C  | 6.3499367  | 3.9467433  | 2.2470742  |
| C  | 1.3571888  | 5.0321614  | 6.9722948  |
| C  | 2.0225602  | 4.3496902  | 5.9733478  |
| C  | 5.6595975  | 2.9930359  | 3.2204307  |
| C  | 4.1862873  | 5.2865146  | 6.7296605  |
| C  | 5.6959017  | 5.5862513  | 0.4674662  |
| Br | 12.2108228 | -0.7856065 | 5.8013724  |
| O  | 8.1487745  | 3.5253974  | 4.5871795  |
| O  | 4.2065339  | -0.1202430 | 8.5539015  |
| N  | 5.7768561  | 2.2328304  | 9.0235228  |
| N  | 7.7316852  | 3.6692029  | 7.4414835  |
| C  | 8.7408209  | 2.8620022  | 7.4123822  |
| C  | 9.3237198  | 2.2341956  | 6.2532102  |
| C  | 5.1906780  | 1.9051247  | 7.6692762  |
| C  | 10.5951039 | 0.9068165  | 4.1184287  |
| C  | 9.6642095  | 1.8961434  | 3.8595504  |
| C  | 4.7561441  | 0.1201818  | 9.8326149  |
| C  | 5.0247889  | 0.3999054  | 7.5284650  |
| C  | 5.9768531  | 3.7175555  | 9.2239899  |
| C  | 10.9137097 | 0.5746359  | 5.4504120  |
| C  | 10.2967221 | 1.2331864  | 6.4959086  |
| C  | 7.3510679  | 4.1908485  | 8.7444280  |
| C  | 8.9886727  | 2.6012992  | 4.9044571  |
| C  | 4.9229485  | 1.6112552  | 10.1006658 |
| O  | 7.6364794  | 6.2891064  | 5.0935402  |

|    |            |            |            |
|----|------------|------------|------------|
| Cl | 8.7730748  | 6.7540859  | 6.3041503  |
| H  | 6.7946742  | 6.5709179  | 2.7536099  |
| H  | 5.5195618  | 6.0089458  | 3.8463186  |
| H  | 1.5450948  | 6.4093163  | 8.6427824  |
| H  | 4.0044596  | 6.6354119  | 8.4096309  |
| H  | 5.0416187  | 7.1502583  | -0.8511814 |
| H  | 3.7535347  | 6.5177593  | 0.2168463  |
| H  | 3.7814848  | 7.2503841  | 2.5432027  |
| H  | 5.0967166  | 8.3598266  | 3.0316407  |
| H  | 7.2882607  | 4.3202465  | 2.6732343  |
| H  | 6.5606624  | 3.4138089  | 1.3101465  |
| H  | 1.4698995  | 3.7167000  | 5.2760633  |
| H  | 4.7775889  | 2.5337174  | 2.7348588  |
| H  | 6.3894524  | 2.1961539  | 3.4266481  |
| H  | 5.4399091  | 4.7397572  | -0.1840391 |
| H  | 6.7636983  | 5.8234051  | 0.3623338  |
| H  | 3.3061260  | 3.2338045  | 4.0635240  |
| H  | 4.5091976  | 4.8700532  | 1.9888447  |
| H  | 4.2185209  | 2.4142970  | 7.6230990  |
| H  | 5.8537462  | 2.3249744  | 6.9045632  |
| H  | 11.0865808 | 0.3894409  | 3.2920972  |
| H  | 9.4233740  | 2.1698410  | 2.8298668  |
| H  | 4.0659340  | -0.3003013 | 10.5778672 |
| H  | 5.7335302  | -0.3933437 | 9.9371098  |
| H  | 6.0162570  | -0.0983277 | 7.5277170  |
| H  | 4.5348425  | 0.1832968  | 6.5680393  |
| H  | 5.1593304  | 4.2184223  | 8.6993949  |
| H  | 5.8830978  | 3.9173388  | 10.2995173 |

|   |            |           |            |
|---|------------|-----------|------------|
| H | 10.5498608 | 0.9847852 | 7.5286444  |
| H | 8.1072980  | 3.9166416 | 9.5029618  |
| H | 7.3077212  | 5.2896748 | 8.6938707  |
| H | 5.4144612  | 1.7929910 | 11.0657380 |
| H | 3.9573667  | 2.1360608 | 10.0754834 |
| H | 9.2292438  | 2.5994717 | 8.3680940  |
| H | 6.7017174  | 1.7837933 | 9.0739964  |

**Table S12** Optimized coordinates for Complex 2=O.

total energy = -8392.72547738049 Hartree

72

|    |            |           |           |
|----|------------|-----------|-----------|
| Br | -0.2671725 | 7.3384833 | 6.4381363 |
| Cu | 6.6875848  | 4.9738824 | 6.0801741 |
| O  | 5.4109122  | 5.5417193 | 7.3233453 |
| O  | 5.2236695  | 6.7790858 | 0.8292362 |
| N  | 5.7324653  | 4.5957234 | 2.5889121 |
| N  | 4.9074312  | 3.6031000 | 5.1530910 |
| C  | 3.7327755  | 4.1036042 | 5.2877764 |
| C  | 3.3328802  | 5.2197021 | 6.1371276 |
| C  | 6.7946950  | 5.1675788 | 1.7539998 |
| C  | 2.4067983  | 7.5405861 | 7.4637194 |
| C  | 3.7258875  | 7.1341907 | 7.6099732 |
| C  | 4.1936254  | 6.2458370 | 1.6403308 |
| C  | 6.4905202  | 6.6305126 | 1.4476064 |
| C  | 6.0281461  | 3.2200046 | 2.9794405 |
| C  | 1.5439943  | 6.7893973 | 6.6520800 |
| C  | 2.0028955  | 5.6572626 | 5.9893381 |

|    |            |            |           |
|----|------------|------------|-----------|
| C  | 5.0866556  | 2.6587964  | 4.0606179 |
| C  | 4.2114939  | 5.9516064  | 6.9993323 |
| C  | 4.4317164  | 4.7687698  | 1.9390906 |
| Br | 12.7559060 | 0.7936280  | 5.1347771 |
| O  | 8.1498859  | 4.6974855  | 4.9104727 |
| O  | 4.6554377  | -1.1020861 | 7.7184341 |
| N  | 5.5481027  | 1.4781988  | 8.6049707 |
| N  | 7.4280470  | 3.7693211  | 7.4665566 |
| C  | 8.5410357  | 3.1156825  | 7.3313357 |
| C  | 9.3631209  | 3.0329581  | 6.1652120 |
| C  | 5.6517357  | 1.0314684  | 7.1657740 |
| C  | 11.0441044 | 2.7721440  | 3.9358737 |
| C  | 9.9818621  | 3.6566443  | 3.8915503 |
| C  | 4.5663928  | -0.7558433 | 9.0844062 |
| C  | 5.7601303  | -0.4852865 | 7.0964019 |
| C  | 5.4198553  | 2.9769682  | 8.7575613 |
| C  | 11.2851910 | 2.0068436  | 5.0966369 |
| C  | 10.4644335 | 2.1387582  | 6.1968371 |
| C  | 6.7571936  | 3.7080745  | 8.7630666 |
| C  | 9.1071472  | 3.8253322  | 5.0031207 |
| C  | 4.4042196  | 0.7474707  | 9.2712221 |
| O  | 6.0550206  | 6.2235925  | 4.9232871 |
| H  | 6.8979891  | 4.6019806  | 0.8024066 |
| H  | 7.7459280  | 5.1021335  | 2.3031855 |
| H  | 2.0499027  | 8.4403518  | 7.9673876 |
| H  | 4.4164017  | 7.7030589  | 8.2352907 |
| H  | 3.2485867  | 6.3768326  | 1.0914471 |
| H  | 4.1308695  | 6.8067171  | 2.5955155 |

|   |            |            |            |
|---|------------|------------|------------|
| H | 6.5245668  | 7.2156815  | 2.3885210  |
| H | 7.2393110  | 7.0378542  | 0.7514114  |
| H | 7.0578613  | 3.2076099  | 3.3588796  |
| H | 5.9903434  | 2.5306519  | 2.1078264  |
| H | 1.3319830  | 5.1013631  | 5.3319761  |
| H | 4.1127918  | 2.3724452  | 3.6202285  |
| H | 5.5545764  | 1.7331882  | 4.4371302  |
| H | 3.6281344  | 4.4036778  | 2.5949293  |
| H | 4.3831437  | 4.1858617  | 0.9931338  |
| H | 2.9083882  | 3.7131138  | 4.6626867  |
| H | 5.9315511  | 5.6850382  | 4.0941212  |
| H | 4.7367956  | 1.3840183  | 6.6740057  |
| H | 6.5139850  | 1.5274885  | 6.7070549  |
| H | 11.6987537 | 2.6693650  | 3.0685557  |
| H | 9.8048374  | 4.2604925  | 3.0004653  |
| H | 3.6841028  | -1.2617031 | 9.5018580  |
| H | 5.4615179  | -1.1113657 | 9.6339960  |
| H | 6.7102840  | -0.8249322 | 7.5574370  |
| H | 5.7655504  | -0.7915336 | 6.0402213  |
| H | 4.7646199  | 3.3320365  | 7.9557423  |
| H | 4.9296945  | 3.1496957  | 9.7248564  |
| H | 10.6477149 | 1.5547514  | 7.1003815  |
| H | 7.4297097  | 3.2526504  | 9.5110293  |
| H | 6.5392943  | 4.7312856  | 9.0948250  |
| H | 4.4071831  | 1.0223598  | 10.3345309 |
| H | 3.4833475  | 1.1159665  | 8.7975524  |
| H | 8.8975831  | 2.5371556  | 8.1967546  |
| H | 6.4075695  | 1.1862742  | 9.0895799  |

**Table S13** Crystal data of Complex 1 and Complex 2

|                                                                         |                                                                 |                                                                                  |
|-------------------------------------------------------------------------|-----------------------------------------------------------------|----------------------------------------------------------------------------------|
| Formula                                                                 | C <sub>36</sub> H <sub>40</sub> CuN <sub>2</sub> O <sub>2</sub> | C <sub>26</sub> H <sub>34</sub> CuBr <sub>2</sub> N <sub>6</sub> O <sub>10</sub> |
| Formula weight                                                          | 596.24                                                          | 813.94                                                                           |
| <i>T</i> (K)                                                            | 144(2)                                                          | 293(2)                                                                           |
| Crystal color                                                           | brown                                                           | brown                                                                            |
| Crystal system                                                          | triclinic                                                       | triclinic                                                                        |
| Space group                                                             | <i>P</i> -1                                                     | <i>P</i> -1                                                                      |
| <i>a</i> (Å)                                                            | 5.6160(16)                                                      | 8.1767(6)                                                                        |
| <i>b</i> (Å)                                                            | 11.962(3)                                                       | 8.1955(6)                                                                        |
| <i>c</i> (Å)                                                            | 12.004(4)                                                       | 12.1083(8)                                                                       |
| $\alpha$ (°)                                                            | 113.799(9)                                                      | 92.454(2)                                                                        |
| $\beta$ (°)                                                             | 91.846(10)                                                      | 109.282(2)                                                                       |
| $\gamma$ (°)                                                            | 100.923(9)                                                      | 95.012(2)                                                                        |
| <i>V</i> (Å <sup>3</sup> )                                              | 719.2(4)                                                        | 760.74(9)                                                                        |
| <i>Z</i>                                                                | 1                                                               | 1                                                                                |
| Crystal dimensions (mm)                                                 | 0.4×0.2×0.1                                                     | 0.5×0.3×0.1                                                                      |
| <i>F</i> (0 0 0)                                                        | 315.0                                                           | 411.0                                                                            |
| <i>D</i> <sub>c</sub> (g cm <sup>-3</sup> )                             | 1.377                                                           | 1.772                                                                            |
| $\lambda$ (Mo K $\alpha$ ) (Å)                                          | 0.71073                                                         | 0.71073                                                                          |
| $\theta$ Range (°)                                                      | 3.18-26.65                                                      | 2.502-27.565                                                                     |
| Reflection collected/<br>unique/observed                                | 7758, 3266, 2550                                                | 25925, 3505, 3176                                                                |
| Absorption correction                                                   | multi-scan                                                      | multi-scan                                                                       |
| <i>R</i> <sub>int</sub>                                                 | 0.0485                                                          | 0.1122                                                                           |
| Final <i>R</i> <sub>1</sub> index [ <i>I</i> > 2 $\sigma$ ( <i>I</i> )] | 0.0763                                                          | 0.0366                                                                           |
| Final <i>wR</i> <sub>2</sub> index (all reflections)                    | 0.1034                                                          | 0.1074                                                                           |
| Goodness-of-fit                                                         | 1.068                                                           | 1.017                                                                            |
